# Supplementary material for: Enhancing CO2 photoreduction through unique 2D MOF-based heterostructures with metalloid doping
Source: Royal Society of Chemistry journal article supplement (doi:10.1039/d3ta07846a), 2024-01-01
Supplement: d3ta07846a1.pdf [file d3ta07846a1.pdf]

## Appendix A. Supplementary data

### Enhancing CO<sub>2</sub> Photoreduction through Unique 2D MOF-Based Heterostructures with Metalloid Doping

Xiaoxiong Hou<sup>a</sup>, Zhuangzhuang Ma<sup>a</sup>, Zhilei Zhang<sup>b,c</sup>, Peijin Zou<sup>a</sup>, Hongqiang

Wang<sup>d\*</sup>, Lichao Jia<sup>a\*</sup>

<sup>a</sup> *Key Laboratory of Applied Surface and Colloid Chemistry, National Ministry of Education, Shaanxi Key Laboratory for Advanced Energy Devices, Shaanxi Engineering Lab for Advanced Energy Technology, School of Materials Science and Engineering, Shaanxi Normal University, 620 West Chang'an Street, Xi'an, Shaanxi 710119, China*

<sup>b</sup> *Beijing National Laboratory for Molecular Sciences, Key Laboratory of Organic Solids, Institute of Chemistry, Chinese Academy of Sciences, Beijing 100190, China.*

<sup>c</sup> *University of the Chinese Academy of Sciences, Beijing 100049, China.*

<sup>d</sup> *State Key Laboratory of Solidification Processing, Center for Nano Energy Materials, School of Materials Science and Engineering, Northwestern Polytechnical University and Shaanxi Joint Laboratory of Graphene, Xi'an, 710072, P. R. China*

\* Corresponding author.

E-mail: [hongqiang.wang@nwpu.edu.cn](mailto:hongqiang.wang@nwpu.edu.cn); [lichaojia@snnu.edu.cn](mailto:lichaojia@snnu.edu.cn)

## 1. Sample preparation

0.33 g  $Zn(NO_3)_2 \cdot 6H_2O$  and 0.985 g 2-methylimidazole were dissolved in 90 mL  $H_2O$ , respectively, and stirred for 30 min to form a clear solution A and B. The obtained solution A was added into the solution B, the mixture solution was kept stirring for 24 h at room temperature. The obtained product was filtered and washed with water and ethanol for three times, and dried in an vacuum oven under 65 °C named ZIF-8 nanosheet (ZIF-8NS).

## 2. The test of photoelectrochemical and efficiency

The mott-Schottky test can be used to determine the type of semiconductor and the flat band potential of the semiconductor material. Combined with the band gap of the semiconductor measured by UV-VIS analysis, the position of the valence band of the semiconductor material can be estimated. The adopted three-electrode working system was tested under dark condition with a voltage range of -0.5-0.7 VAg/AgCl and a working frequency of 1000 Hz. The carrier concentration of the semiconductor was calculated by formula 1.1 and 1.2 combined with the slope of the curve.

$$\frac{1}{C^2} = 2(V_s - V_f - \frac{kT}{e}) / (e\epsilon_0\epsilon N_d A^2) \quad (1.1)$$

$$N_d = \left( \frac{2}{e\epsilon_0\epsilon} \right) \times \left( \frac{d\left(\frac{1}{C^2}\right)}{dV_s} \right)^{-1} \quad (1.2)$$

$C$ ,  $e$ ,  $V_s$ ,  $V_f$ ,  $K$ ,  $N_d$ ,  $A$ ,  $\epsilon_0$ ,  $\epsilon$  and  $(d(1/C^2)/dV_s)$  are representation of space charge capacitance, charge amount of an electron, external bias, flat band potential, Boltzmann constant, donor concentration of N-type semiconductor, test area of photoanode, vacuum dielectric constant  $8.854 \times 10^{-12} \text{ Fm}^{-1}$ , relative dielectric constant of CuO (10.26)

and ZIF-8 (1.82) and the slope of Mottschottky curve, respectively.

The carrier transfer efficiency of catalysts can be measured by Electrochemistry Impedance Spectroscopy (EIS). The test conditions are as follows: the test frequency range is 0.1-1 MHz under dark state condition. The bias of the perturbation signal is 10 mV. Current density-Voltage (J-V) curve can be measured at voltage range of -0.6-1.2  $V_{Ag/AgCl}$ , and the voltage scan speed is 10  $mVs^{-1}$  in the light condition. The potential of the photoelectric pole is converted to a relative reversible hydrogen electrode by the Nernst:

$$V_{RHE} = V_{Ag/Cl} + 0.197 + 0.0591V \times pH \quad (1.3)$$

$$V_{NHE} = V_{Ag/Cl} + 0.197 \quad (1.4)$$

Before measurement of transient current spectrum (I-T), the light intensity of the light source was adjusted to  $100 \text{ mW} \cdot \text{cm}^{-2}$ , and time and bias are set to 500 seconds and 10 mV, respectively. The sample was illuminated with the light source for 30 seconds before the light source was blocked first, and then the light was shaded for 30 seconds. Repeat this procedure until the end of time. Working electrode was put into the system to stabilize before start collecting data to record its current change. The current magnitude was detected under open circuit voltage.

#### **Calculation of Apparent Quantum Yield (QE%):**

The apparent quantum yield (QE) is defined as the ratio of number of reacted electrons to the number of incident photons. In general, two electrons are required to produce one CO molecule, whereas, eight electrons are needed to produce one  $\text{CH}_4$  molecule. The apparent quantum yield (QE) measurement was performed using the

equation below:

$$QE(\%) = \frac{2 \times N_a \times N_{(CO)} + 8 \times N_a \times N_{(CH_4)}}{I \times A \times \frac{\lambda}{hc} \times t} \times 100\% \quad (1.5)$$

where,  $N_{(CO)}$  is number of CO (mole) evolved and  $N_{(CH_4)}$  is number of  $CH_4$  (mole) evolved in time “t” (1 h),  $N_a$  is Avogadro’s number ( $N = 6.022 \times 10^{23} \text{mol}^{-1}$ ),  $I$  is the incident solar irradiance ( $I=1.89 \text{ mW cm}^{-2}$ ), 300 W Xenon lamp (Beijing Zhongjiaojinyuan Technology Co. Ltd., China) was positioned 10 cm above the reactor, and the focused areas in the reactor for the lamp was  $28.26 \text{ cm}^2$ .  $\lambda$  is the wavelength of the study (379 nm),  $h$  is Planck's constant ( $6.62 \times 10^{-34} \text{ J}\cdot\text{s}$ ),  $c$  is the speed of light ( $3.0 \times 10^8 \text{ m s}^{-1}$ ).

#### Energy Conversion Efficiency (CE%):

$$CE(\%) = \frac{\Delta H_{(CO)} \times N_{(CO)} + \Delta H_{(CH_4)} \times N_{(CH_4)}}{I \times A \times t} \times 100\% \quad (1.6)$$

where,  $N_{(CO)}$  is number of CO ( $183.33 \text{ }\mu\text{mol}$ , mole) evolved and  $N_{(CH_4)}$  is number of  $CH_4$  ( $32.67 \text{ }\mu\text{mol}$ , mole) evolved in time “t” (1 h),  $\Delta H_{(CO)}$  is heat of combustion of CO ( $\Delta H_{(CO)} = 283.0 \text{ kJ mol}^{-1}$ ) and  $\Delta H_{(CH_4)}$  is heat of combustion of  $CH_4$  ( $\Delta H_{(CH_4)} = 890.0 \text{ kJ mol}^{-1}$ ),  $I$  is the incident solar irradiance ( $I = 500 \text{ mW cm}^{-2}$ ) over the exposed irradiated area  $A$  ( $28.26 \text{ cm}^2$ ).

Mechanism of  $CO_2$  reduction:

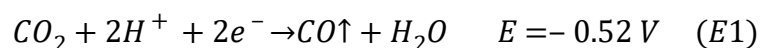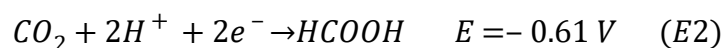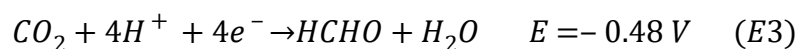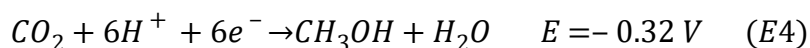

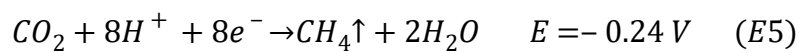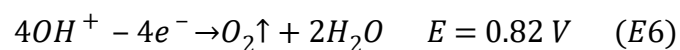

## 1. Figures

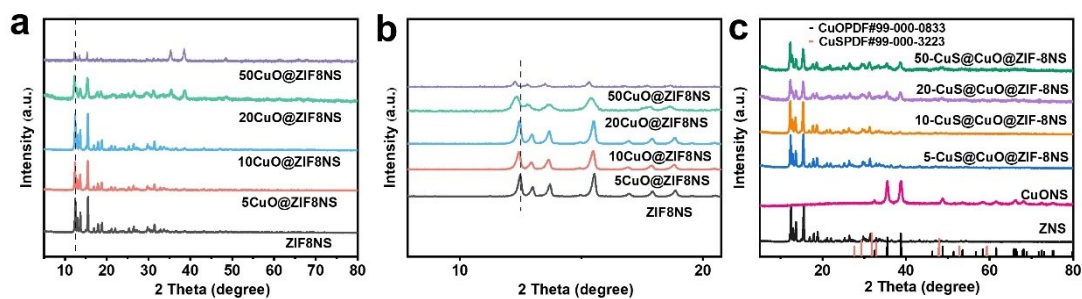

**Figure S1.** XRD (a), HRXRD (b) patterns of CuO@ZIF-8NS and (c) XRD of CuS@CuO@ZIF-

8NS.

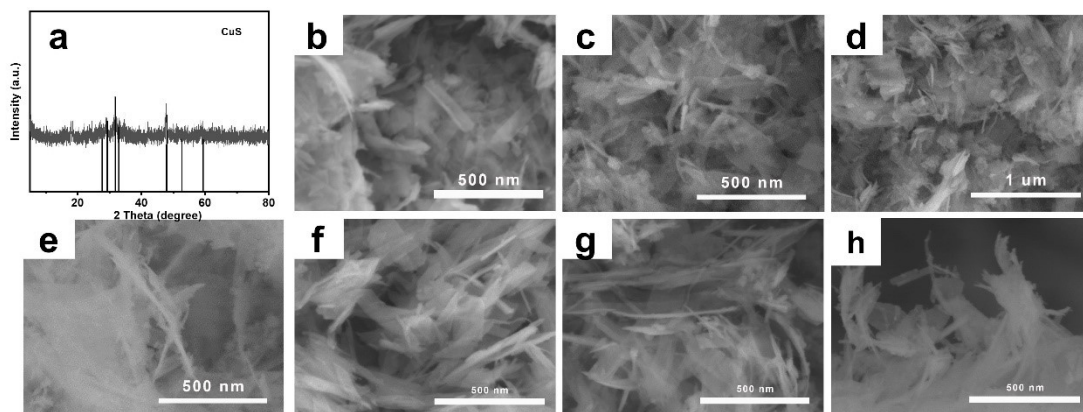

**Figure S2.** XRD patterns of naked CuS (a); SEM images of samples with different time and temperature: (b) 5 min-80 °C, (c) 10 min-80 °C, (d) 20 min-80 °C, (e) 40 min-80 °C, (f) 10 min-30 °C, (g) 10 min-60 °C and (h) 10 min-100 °C.

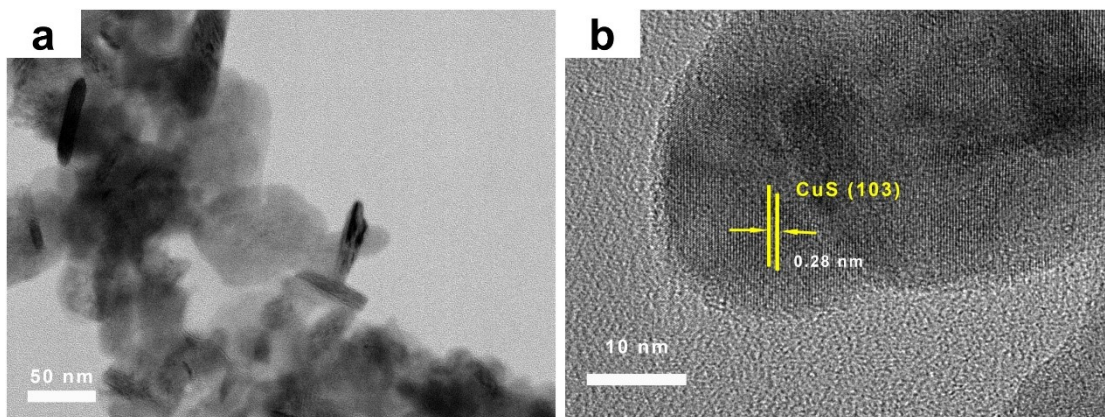

**Figure S3.** TEM (a) and HRTEM (b) images of CuS.

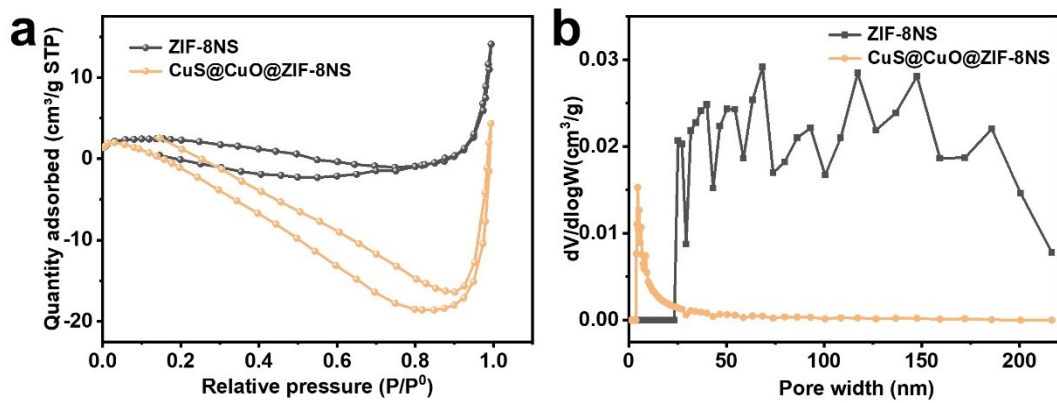

**Figure S4.** N<sub>2</sub>-BET curves (a) and corresponding pore width (b) of catalysts.



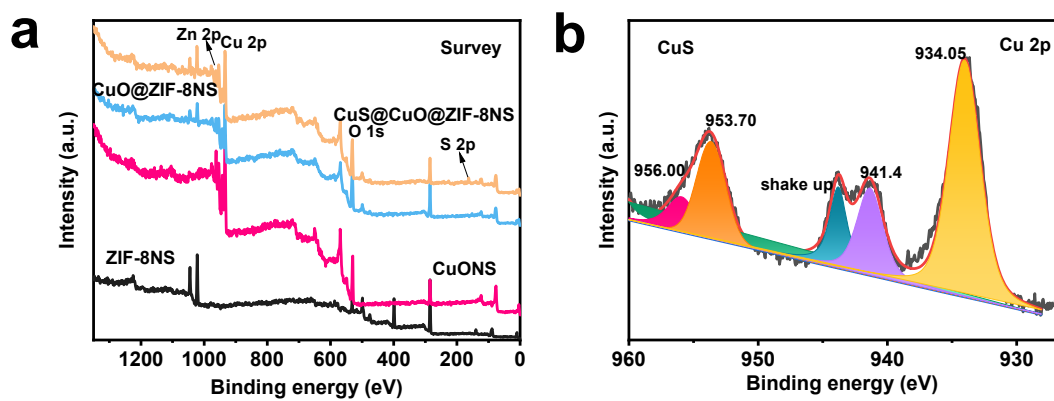

Figure S5. XPS Survey (a) and Cu 2p (b) of samples.

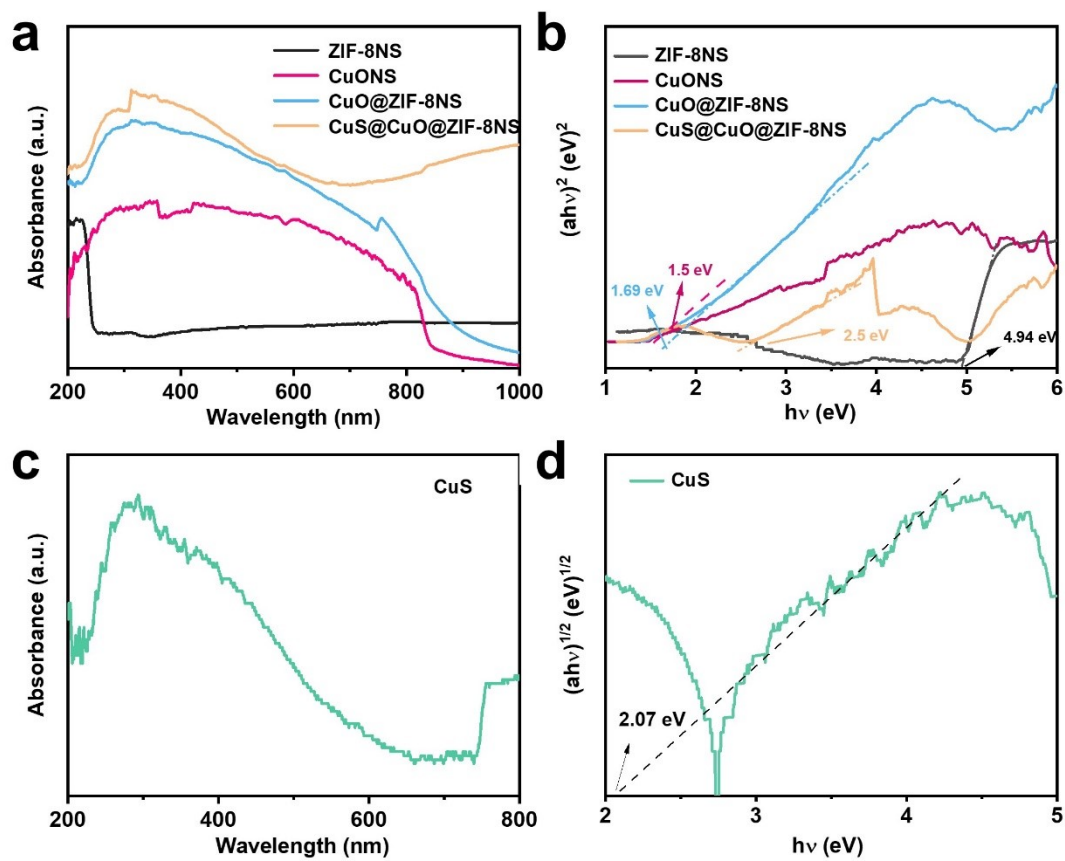

**Figure S6.** UV-vis absorption spectra (a), (c) and corresponding Tauc's band gap plots (b), (d) of catalysts

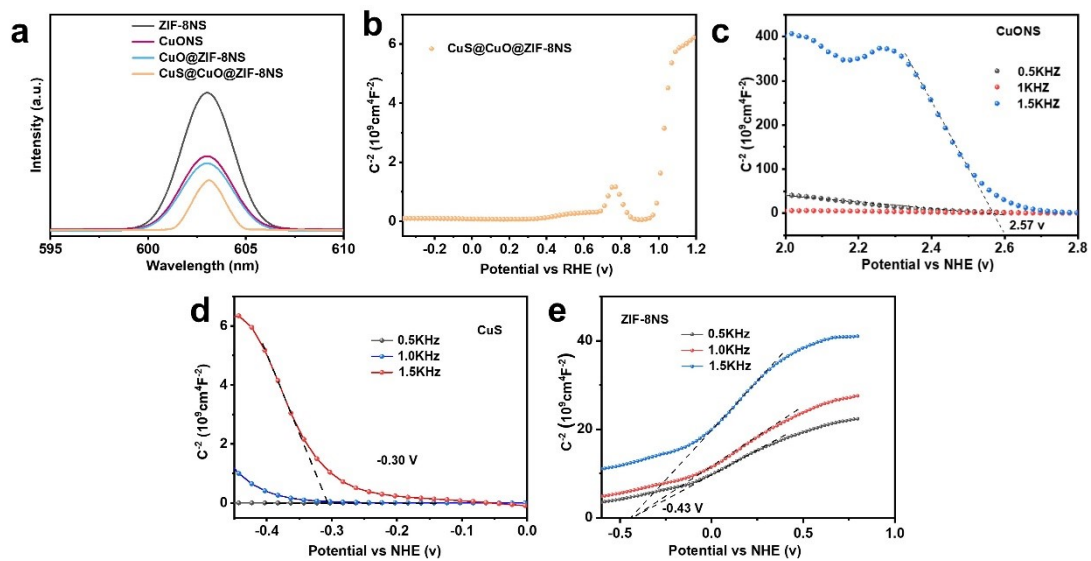

Figure S7. PL spectra(a), Mott-Schottky curves (b-e) of different samples.

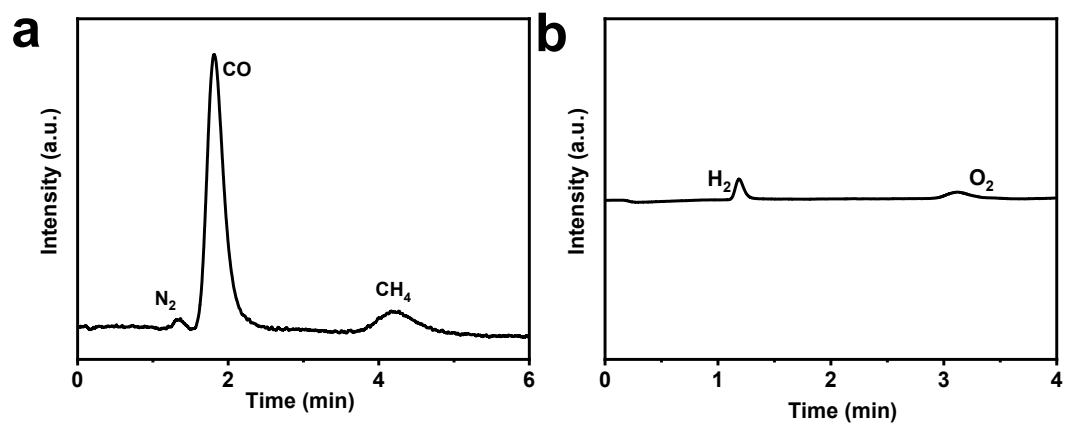

**Figure S8.** Gas chromatogram for FID (a) and TCD (b) over  $CuS@CuO@ZIF-8NS$  under solar irradiation.

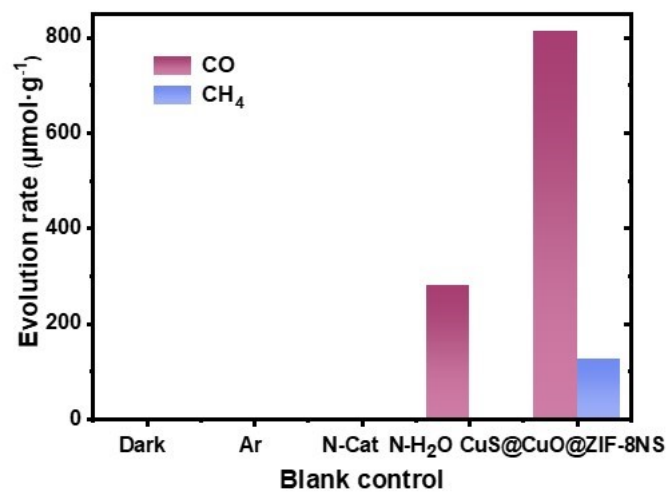

**Figure S9.** Average evolution yields of CO and CH<sub>4</sub> under different conditions.

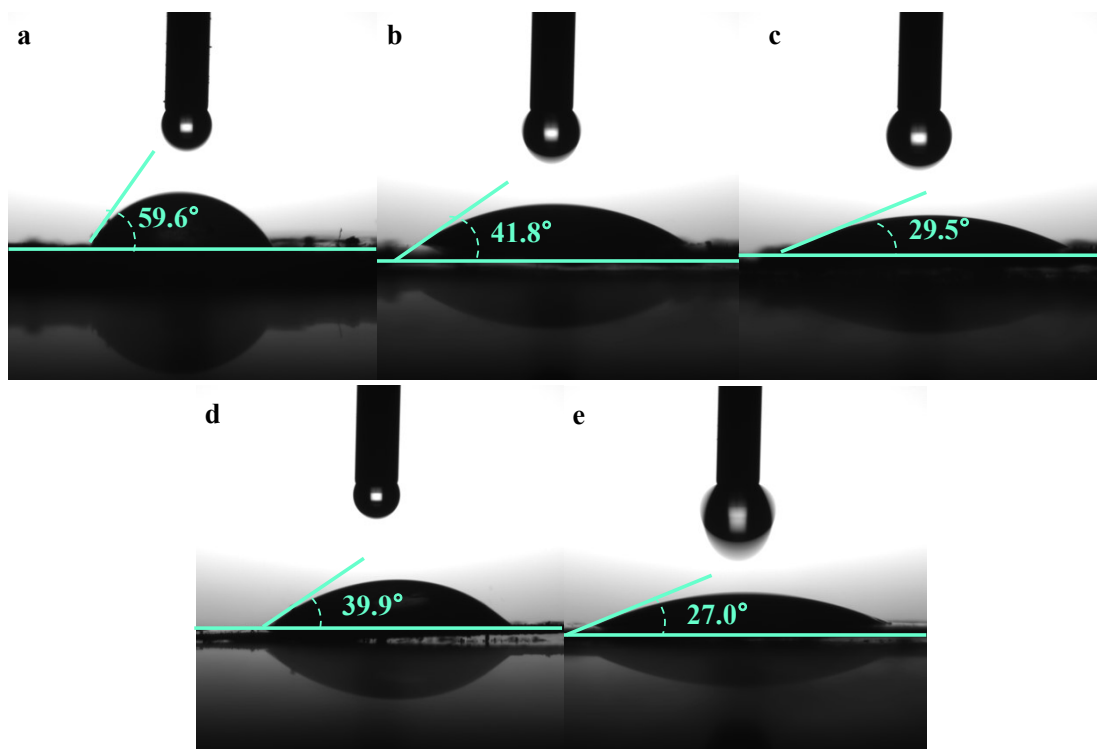

Figure S10. Contact Angle Test of ZIF-8NS(a), CuONS (b), CuO@ZIF-8NS, (c) CuS (d) and CuS@CuO@ZIF-8NS (e).

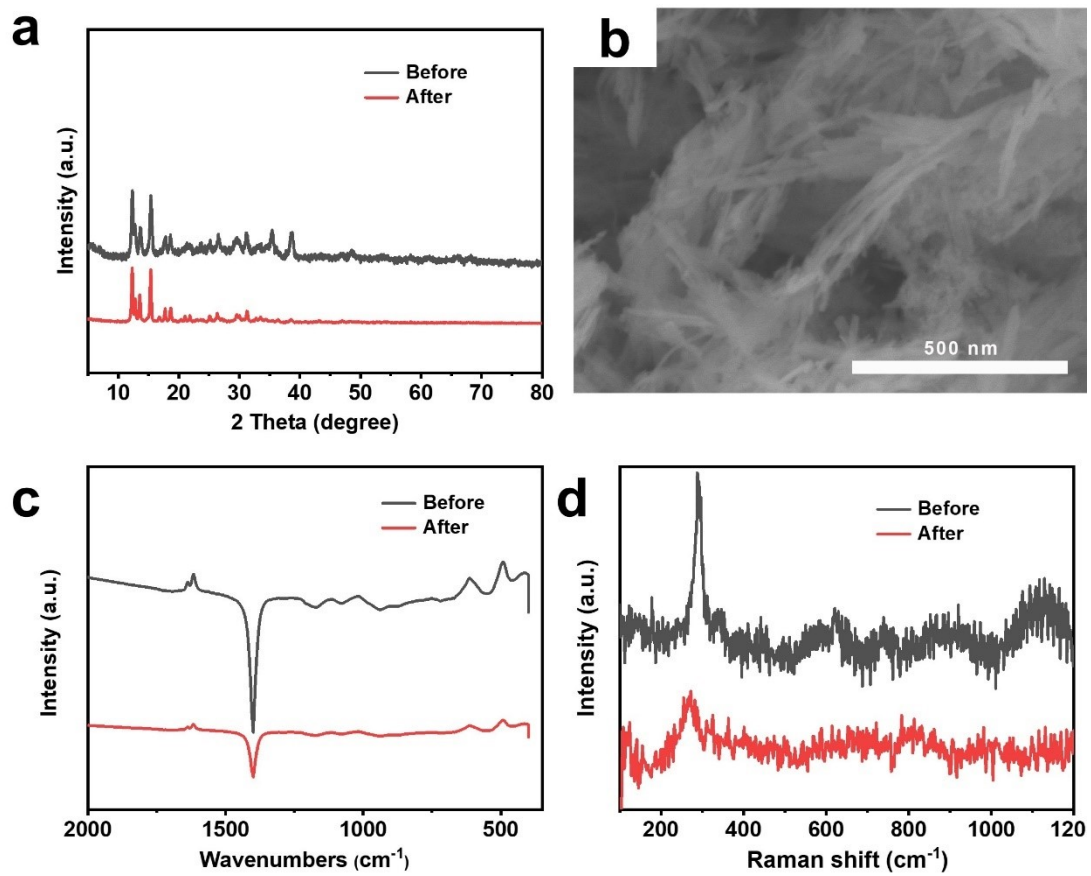

**Figure S11.** (a) XRD pattern (d) SEM, FTIR (c) and Raman (d) images of CuS@CuO@ZIF-8NS

before and after four cycles reaction.

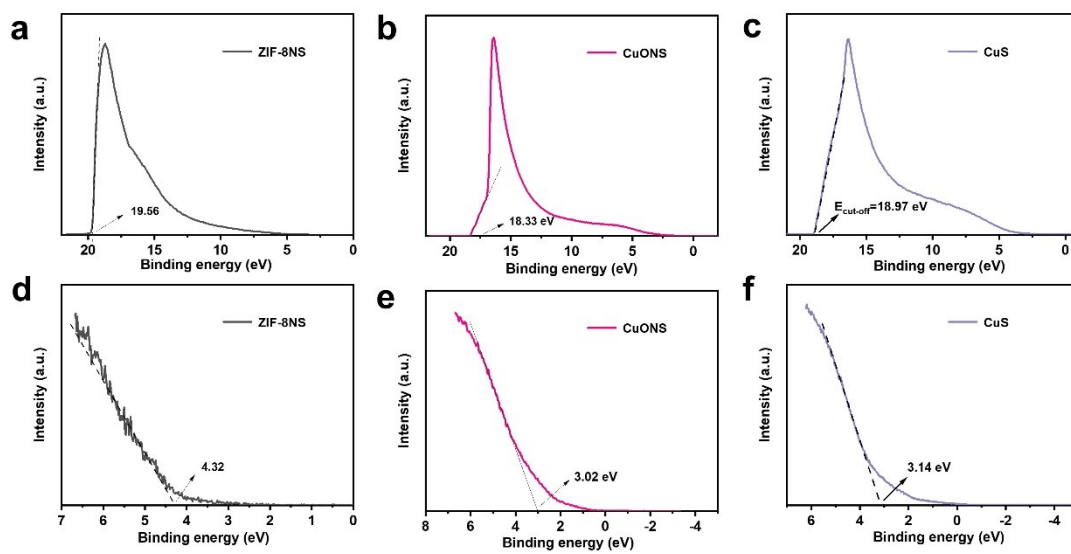

**Figure S12.** Ultraviolet photoelectron spectroscopy (UPS) test of samples.



## 2. Tables

**Table S1** Summary of the specific surface area ( $S_{\text{BET}}$ ), pore volume and average pore size of the prepared samples.

| Catalyst        | $S_{\text{BET}}$ ( $\text{m}^2 \text{g}^{-1}$ )<br>a | Pore volume ( $\text{cm}^3 \text{g}^{-1}$ ) <sup>b</sup> |
|-----------------|------------------------------------------------------|----------------------------------------------------------|
| ZIF-8NS         | 10.2842                                              | 0.005                                                    |
| CuS@CuO@ZIF-8NS | 36.9263                                              | 0.016                                                    |

<sup>a</sup> Surface area obtained by t-Plot method;

<sup>b</sup> Pore width determined by Horvath-Kawazoe method;

**Table S2** The determined energy band parameters of the samples.

| Sample  | $E_g$ (eV) | $E_f$ | $E_{VB}$ (eV) | $E_{CB}$ (eV) |
|---------|------------|-------|---------------|---------------|
| ZIF-8NS | 4.94       | -0.43 | 1.48          | -3.46         |
| CuONS   | 1.50       | -0.30 | 1.41          | -0.09         |
| CuS     | 2.07       | 2.57  | 0.89          | -1.18         |

**Table S3** The photoluminescence decay time ( $\tau$ ) and their relative intensities of charge carriers in the samples.

| Sample      | $\tau_1$ (ns) | $\tau_2$ (ns) | $A_1$  | $A_2$ | Average-lifetime<br>( $\tau$ ,ns) |
|-------------|---------------|---------------|--------|-------|-----------------------------------|
| ZIF-8NS     | 0.56          | 1.39          | -51.48 | 0.33  | 0.39                              |
| CuONS       | 0.12          | 0.82          | 4.33   | 0.39  | 0.16                              |
| CuS         | 0.37          | 0.87          | -35.88 | 0.37  | 0.86                              |
| CuO@ZIF-8NS | 0.18          | 0.97          | 0.21   | 0.35  | 0.90                              |
| CuS@CuO@ZNS | 1.21          | 1.21          | -0.33  | 0.33  | 1.21                              |

The average lifetime was calculated using equation:  $(\tau) = (I_1\tau_1^2 + I_2\tau_2^2) / (I_1\tau_1 + I_2\tau_2)$

**Table S4** Comparative values of charge transfer resistance and solution resistance of the samples.

| Sample          | $R_s$ ( $\Omega$ ) | $R_{ct}$ ( $\Omega$ ) | $C_d$ ( $\mu\text{F}$ ) |
|-----------------|--------------------|-----------------------|-------------------------|
| ZIF-8NS         | 82.84              | 604.2                 | 0.84                    |
| CuONS           | 80.75              | 425.3                 | 0.83                    |
| CuO@ZIF-8NS     | 83.28              | 166.9                 | 0.76                    |
| CuS@CuO@ZIF-8NS | 80.43              | 105.2                 | 0.75                    |

**Table S5** O<sub>2</sub> formation of CO<sub>2</sub> photoreduction over different samples under solar irradiation in TCD detector.

| Sample          | O <sub>2</sub> formation rate (μmol g <sup>-1</sup> h <sup>-1</sup> ) |             |
|-----------------|-----------------------------------------------------------------------|-------------|
|                 | Measured                                                              | Theoretical |
| ZIF-8NS         | 10.35                                                                 | 11.95       |
| CuO@ZIF-8NS     | 34.45                                                                 | 40.57       |
| CuS             | 24.12                                                                 | 26.34       |
| CuO@ZIF-8NS     | 62.23                                                                 | 64.18       |
| CuS@CuO@ZIF-8NS | 155.96                                                                | 157.41      |

The air residuals (N<sub>2</sub>+O<sub>2</sub>) were tested before light irradiation in each experiment. The O<sub>2</sub> generation was obtained by subtracting the air residuals. The theoretical rate of O<sub>2</sub> formation was calculated by

$$(\text{O}_2 \text{ formation rate}) = [(\text{CO formation rate})/2 + (\text{CH}_4 \text{ formation rate}) \times 2].$$

**Table S6** Apparent quantum efficiencies (QE%) and solar-to-chemical fuel conversion efficiencies (CE%) of as-prepared samples.

| Samples             | Yield rate of CO<br>( $\mu\text{mol g}^{-1} \text{h}^{-1}$ ) | Yield rate of<br>CH <sub>4</sub> ( $\mu\text{mol g}^{-1}$<br>$\text{h}^{-1}$ ) | Selectivity<br>(%)                | CE (%) | QE<br>(%) |
|---------------------|--------------------------------------------------------------|--------------------------------------------------------------------------------|-----------------------------------|--------|-----------|
| ZIF-8NS             | 18.93                                                        | 1.24                                                                           | CO 93.85<br>CH <sub>4</sub> 6.15  | 0.0034 | 3.91      |
| CuONS               | 49.65                                                        | 7.87                                                                           | CO 86.32<br>CH <sub>4</sub> 13.68 | 0.011  | 13.3<br>0 |
| CuS                 | 34.80                                                        | 4.47                                                                           | CO 88.61<br>CH <sub>4</sub> 11.39 | 0.0072 | 8.62      |
| CuO@ZIF-8NS         | 85.80                                                        | 10.64                                                                          | CO 88.97<br>CH <sub>4</sub> 11.03 | 0.0176 | 21.0<br>0 |
| CuS@CuO@ZIF-<br>8NS | 270.96                                                       | 44.57                                                                          | CO 85.87<br>CH <sub>4</sub> 14.2  | 0.0422 | 51.5<br>0 |

**Table S7** Comparison of the activity of CuS@CuO@ZIF-8NS in the photocatalytic CO<sub>2</sub> reduction with the catalysts recently reported.

| Photocatalyst                          | Solvent                                   | Light resource                                                          | Major products<br>( $\mu\text{mol g}^{-1} \text{h}^{-1}$ ) | Selectivity<br>(%) <sup>a</sup> | Reference<br>s        |
|----------------------------------------|-------------------------------------------|-------------------------------------------------------------------------|------------------------------------------------------------|---------------------------------|-----------------------|
| TiO <sub>2</sub> /C@ZnCo-ZIF-L         | H <sub>2</sub> O                          | 300 W Xe lamp                                                           | CO 28.6                                                    | --                              | Ref. 51 <sup>51</sup> |
| TiO <sub>2</sub> @UiO-66               | H <sub>2</sub> O                          | 150 W and 300 W, $\lambda > 325$ nm.                                    | CO 1.8                                                     | --                              | Ref. 52 <sup>52</sup> |
| Au@ZIF-67                              | --                                        | 100 W, LCS-100 Xe lamp ( $\lambda < 400$ nm)                            | CO 0.97 g/cm <sup>3</sup>                                  | --                              | Ref. 53 <sup>53</sup> |
| UiO-66-NH <sub>2</sub> -LV             | H <sub>2</sub> O, TEOA                    | 300 W xenon lamp                                                        | CO 30.5                                                    | --                              | Ref. 54 <sup>54</sup> |
| MIL-125-NH <sub>2</sub> (Ti)           | CH <sub>3</sub> CN H <sub>2</sub> O, TEOA | (400 nm $\leq$ $\lambda$ )<br>300 W xenon arc lamp with AM 1.5 G filter | CO 15.49<br>CH <sub>4</sub> 5.46                           | 93.1                            | Ref. 55 <sup>55</sup> |
| ZIF-8                                  | TEOA, H <sub>2</sub> O, MeCN              | 300 W xenon lamp (>400nm)                                               | CO 4.2                                                     | --                              | Ref. 56 <sup>56</sup> |
| H-CdS@ZIF-8/Au                         | H <sub>2</sub> O                          | 300 W Xenon lamp (420 < $\lambda$ < 780 nm)                             | CO 233.8                                                   | CO 90.7                         | Ref. 57 <sup>57</sup> |
| BIF-20@g-C <sub>3</sub> N <sub>4</sub> | MeCN, TEOA                                | 300 W xenon lamp (420 $\leq$ $\lambda$ $\leq$ 800 nm)                   | CO 53.869<br>CH <sub>4</sub> 15.524                        | --                              | Ref.58 <sup>58</sup>  |
| ZIF-8/COF                              | H <sub>2</sub> O                          | LED lamp                                                                | CO 84.87                                                   | CO 91                           | Ref. 59 <sup>59</sup> |
| CuS@CuO@ZIF-8NS                        | H <sub>2</sub> O (gas)                    | 300 W Xenon lamp                                                        | CO 270.96<br>CH <sub>4</sub> 44.57                         | CO 85.8<br>CH <sub>4</sub> 14.1 | <b>This work</b>      |





## References

51. A.W. Zhou, Y.B. Dou, C. Zhao, J. Zhou, X.Q. Wu, J.R. Li, *Appl. Catal. B*, 2019, **264**, 118519.
52. A. Crake, K.C. Christoforidis, A. Gregg, B. Moss, A. Kafizas, C. Petit, *Small*, 2019, **15**, 1805473.
53. T. Tian, J. Xu, A. Abdolazizi, C. Ji, J. Hou, D.J. Riley, C. Yan, M.P. Ryan, F. Xie, C. Petit, *Mater. Today Nano*, 2023, **21**, 100293.
54. S.Q. Wang, X. Gu, X.Z. Wang, X.Y. Zhang, X.Y. Dao, X.M. Cheng, J. Ma, W.Y. Sun, Defect-engineering of Zr(IV)-based metal-organic frameworks for regulating CO<sub>2</sub> photoreduction, *Chem. Eng. J.*, 2022, **429**, 132157.
55. X.M. Cheng, Y.M. Gu, X.Y. Zhang, X.Y. Dao, S.Q. Wang, J. Ma, J. Zhao, W.Y. Sun, *Appl. Catal. B*, 2021, **298**, 120524.
56. Z.G. Liu, Z.Y. Chen, M.Y. Li, J.Y. Li, W.J. Zhuang, X. Yang, S.Q. Wu, J.L. Zhang, *ACS Catal.*, 2023, **13**, 6630-6640.
57. W.H. Mo, Z.X. Fan, S.X. Zhong, We.B. Chen, L.X. Hu, H. Zhou, W. Zhao, H.J. Lin, J. Ge, J.R. Chen, S. Bai, *Small*, 2023, **19**, 2207705.
58. G.L. Xu, H.B. Zhang, J. Wei, H.X. Zhang, X. Wu, Y. Li, C.S. Li, J. Zhang, J.H. Ye, *ACS Nano*, 2018, **12**, 5333-5340.
59. R.G. Yang, Y.M. Fu, H.N. Wang, D.P. Zhang, Z. Zhou, Y.Z. Cheng, X. Meng, Y.O. He, Z.M. Su, *Chem. Eng. J.*, 2022, **450**, 138040.
